# Supplementary material for: Electrochemical DNA sensor for specific detection of picomolar Hg(ii) based on exonuclease III-assisted recycling signal amplification
Source: Royal Society of Chemistry journal article supplement (doi:10.1039/c5an00082c), 2015-01-01
Supplement: c5an00082c1.pdf [file c5an00082c1.pdf]

### Support information

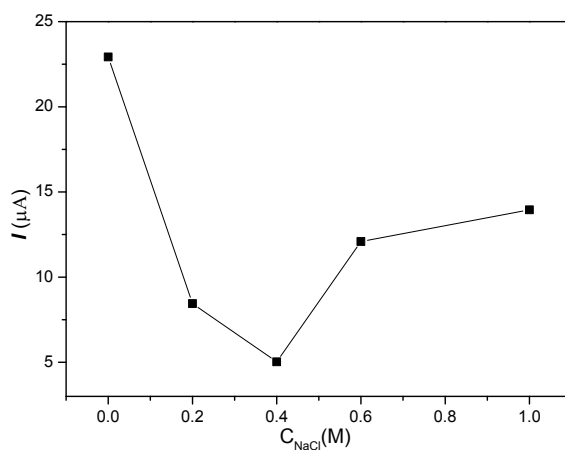

**Fig. S1. Influences of different NaCl concentrations in Buffer-3 containing 50 nM  $\text{Hg}^{2+}$  on the performance of E-DNA sensor. All other conditions are identical. Data were evaluated by SWV.**

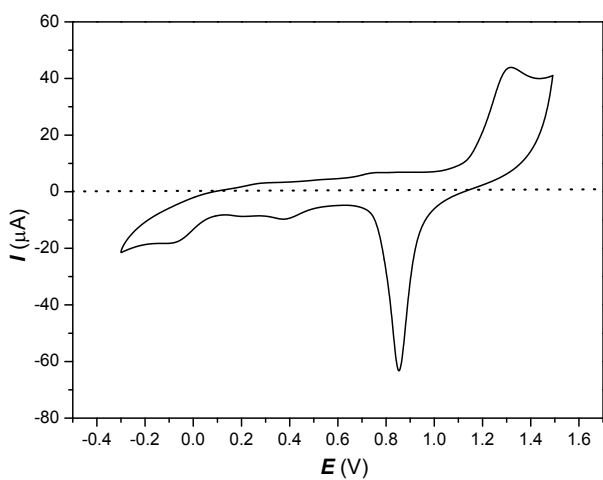

**Fig. S2. Voltammetric behavior of a clean Au electrode in 0.5 M  $\text{H}_2\text{SO}_4$ .**

**Table S1 Performance comparison between the proposal strategy and other electrochemical DNA detection assays for Hg<sup>2+</sup>.**

| <b>Method</b>                                                                           | <b>Linear range</b> | <b>Detection limit</b> | <b>Analytical technique</b> | <b>Reference</b> |
|-----------------------------------------------------------------------------------------|---------------------|------------------------|-----------------------------|------------------|
| DNA functionalized graphene                                                             | 8-100 nM            | 5 nM                   | DPV                         | 12               |
| Hg <sup>2+</sup> catalyst H <sub>2</sub> AuCl <sub>4</sub> /NH <sub>2</sub> OH reaction | 0.5-120 nM          | 0.06 nM                | DPV                         | 14               |
| Inhibition of activity urease enzyme                                                    | 6-60 nM             | 56 nM                  | CT                          | 19               |
| SRP enzymatic E-DNA sensor                                                              | 0.5 nM-1 μM         | 0.3 nM                 | CV                          | 20               |
| DNA structure-switching                                                                 | 0.1 nM-5 μM         | 0.06nM                 | DPV                         | 21               |
| Hg <sup>2+</sup> -induced DNA hybridization                                             | 1nM -10 μM          | 0.6 nM                 | CV                          | 22               |
| DNA conformational switch and Exo III's activity                                        |                     | 0.2 nM                 | DPV                         | 23               |
| DNA conformational switch                                                               | 1 nM-2.0 μM         | 0.5 nM                 | ASV                         | 38               |
| T-Hg <sup>2+</sup> -T complex                                                           | 0.1 nM-10 μM        | 0.1 nM                 | EIS                         | 39               |
| Our E-DNA sensor                                                                        | 0.01-500 nM         | 1 pM                   | SWV                         |                  |

Abbreviations: SRP, streptavidin-horseradish peroxidase; E-DNA, electrochemical DNA; CV, cyclic voltammograms; EIS, electrochemical impedance spectroscopy; DPV, differential pulse voltammetry; SWV, square wave voltammetry; ASV, anodic stripping voltammetry; CT, chronoamperometry.

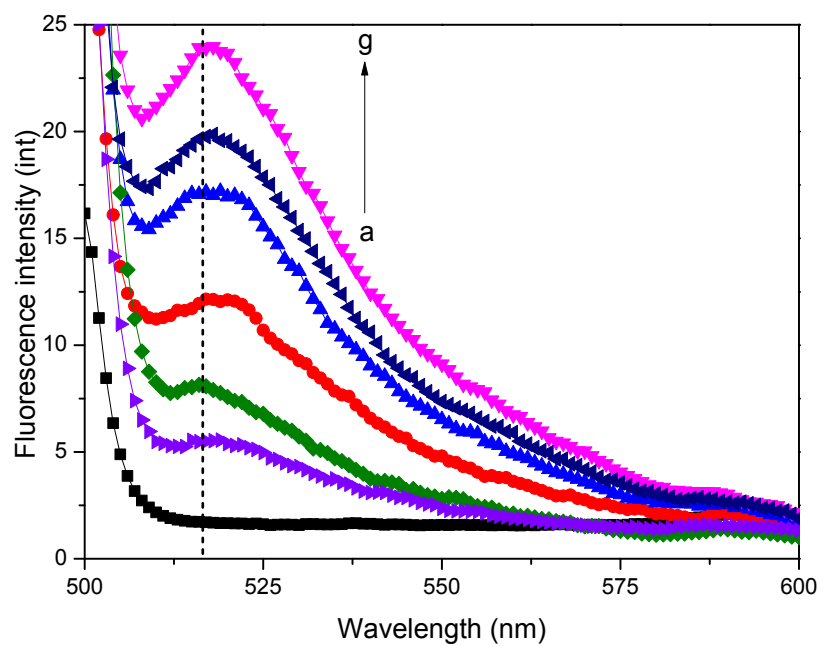

**Fig. S3** Fluorescence spectra ( $\lambda_{EX}=494\text{nm}$ ;  $\lambda_{EM}=517\text{nm}$ ) of Exo III incubation buffer at different incubation times (a-g: 0, 5, 10, 20, 30, 40 and 60 min) for detecting 50 nM  $\text{Hg}^{2+}$ . 30  $\mu\text{L}$  of buffer solution was diluted to 1 mL for the fluorescence test.
